# Supplementary material for: Characteristics of atmospheric mercury in a suburban area of east China: sources, formation mechanisms, and regional transport
Source: Copernicus journal article supplement (doi:10.5194/acp-19-5923-2019), 2019-05-06
Supplement: Supplementary file 1 [file acp-19-5923-2019-supplement.pdf]

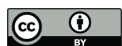

*Supplement of*

**Characteristics of atmospheric mercury in a suburban area of east China: sources, formation mechanisms, and regional transport**

**Xiaofei Qin et al.**

*Correspondence to:* Kan Huang ([huangkan@fudan.edu.cn](mailto:huangkan@fudan.edu.cn)) and Congrui Deng ([congruideng@fudan.edu.cn](mailto:congruideng@fudan.edu.cn))

The copyright of individual parts of the supplement might differ from the CC BY 4.0 License.

Table S1. Atmospheric Hg emissions by province in 2014 (Wu et al., 2016).

| Region             | Provinces         | Atmospheric Hg<br>emissions in<br>2014 (t) | Region                    | Provinces | Atmospheric<br>Hg emissions in<br>2014 (t) |
|--------------------|-------------------|--------------------------------------------|---------------------------|-----------|--------------------------------------------|
| North<br>China     | Beijing           | 3                                          | South<br>central<br>China | Henan     | 66                                         |
|                    | Tianjin           | 5                                          |                           | Hubei     | 14                                         |
|                    | Hebei             | 39                                         |                           | Hunan     | 30                                         |
|                    | Shanxi            | 16                                         |                           | Guangdong | 21                                         |
|                    | Inner<br>Mongolia | 26                                         |                           | Guangxi   | 13                                         |
| Northeast<br>China | Liaoning          | 17                                         | Southwest<br>China        | Hainan    | 2                                          |
|                    | Jilin             | 9                                          |                           | Chongqing | 11                                         |
|                    | Heilongjiang      | 6                                          |                           | Sichuan   | 14                                         |
| East<br>China      | Shanghai          | 5                                          |                           | Guizhou   | 23                                         |
|                    | Jiangsu           | 31                                         |                           | Yunnan    | 15                                         |
|                    | Zhejiang          | 15                                         |                           | Tibet     | 1                                          |
|                    | Anhui             | 17                                         | Northwest<br>China        | Shanxi    | 27                                         |
|                    | Fujian            | 8                                          |                           | Gansu     | 22                                         |
|                    | Jiangxi           | 10                                         |                           | Qinghai   | 3                                          |
|                    | Shandong          | 46                                         |                           | Ningxia   | 6                                          |
|                    |                   |                                            |                           | Xinjiang  | 8                                          |

Table S2. P-value between seasons for GEM concentration

|        | spring | summer | autumn | winter |
|--------|--------|--------|--------|--------|
| spring |        |        |        |        |
| summer | p>0.05 |        |        |        |
| autumn | p<0.05 | p<0.05 |        |        |
| winter | p>0.05 | p>0.05 | p<0.05 |        |

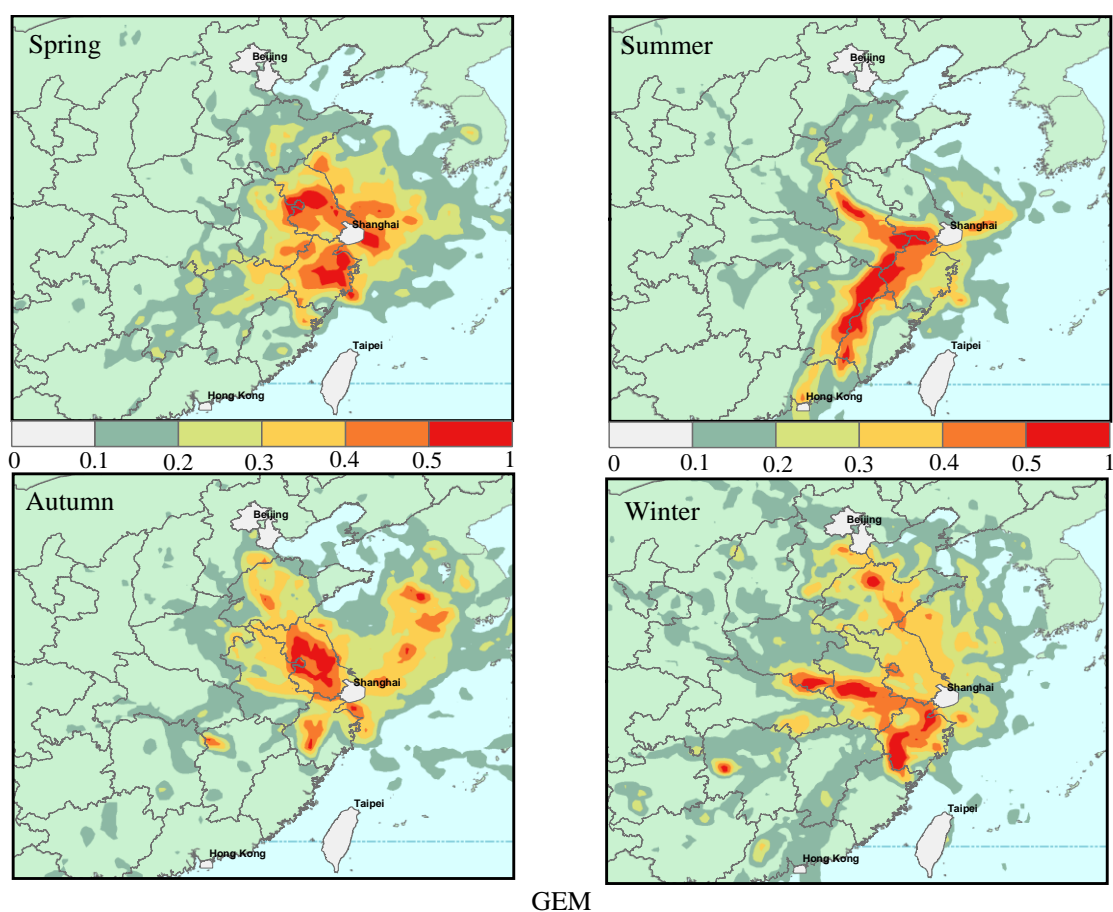

GEM

Figure S1. Potential source regions of seasonal GEM at the sampling site according to PSCF analysis.

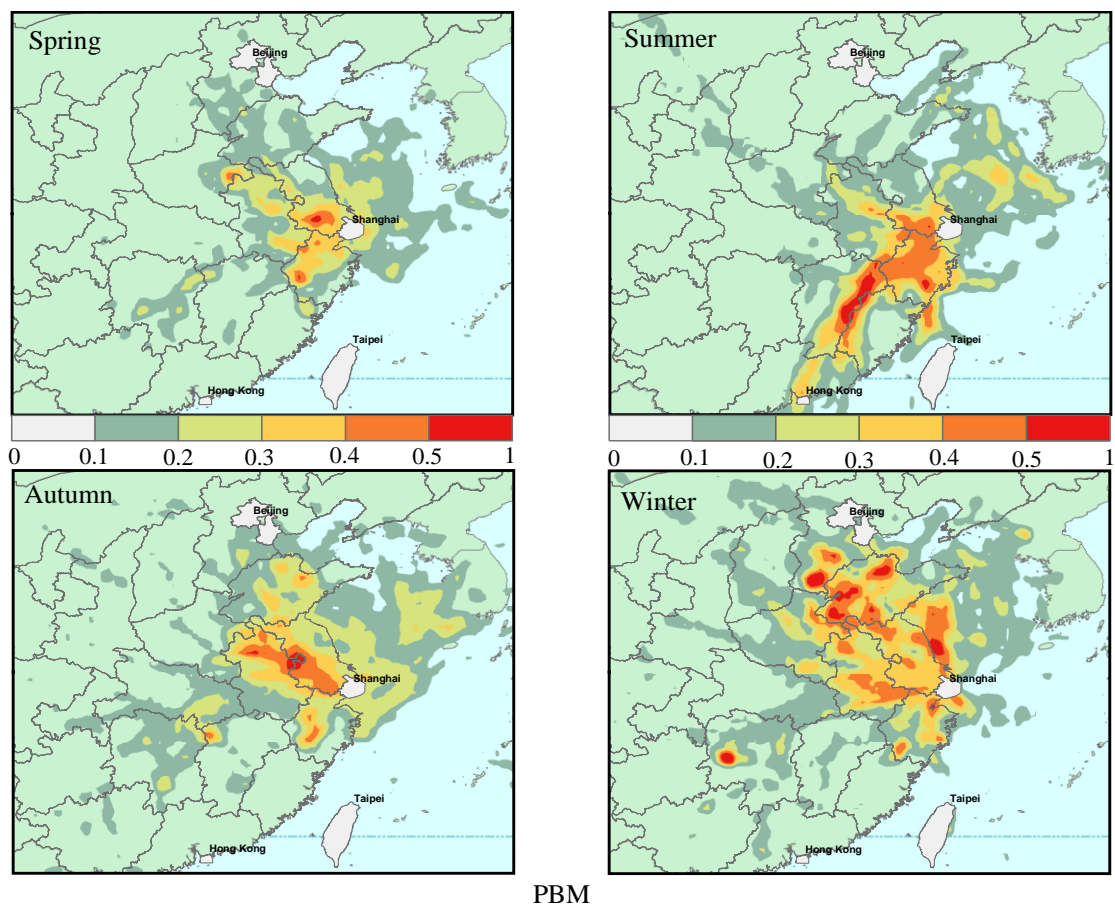

PBM

Figure S2. Potential source regions of seasonal PBM at the sampling site according to PSCF analysis.

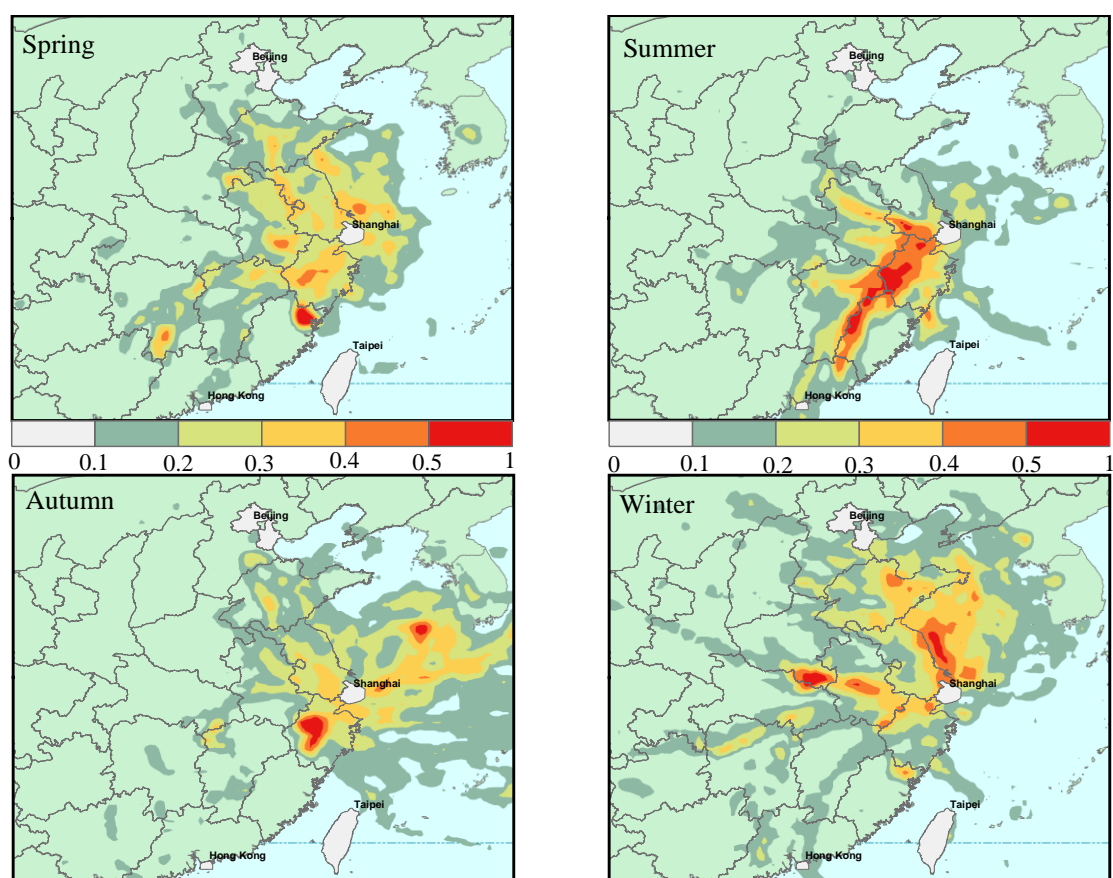

GOM

Figure S3. Potential source regions of seasonal GOM at the sampling site according to PSCF analysis.

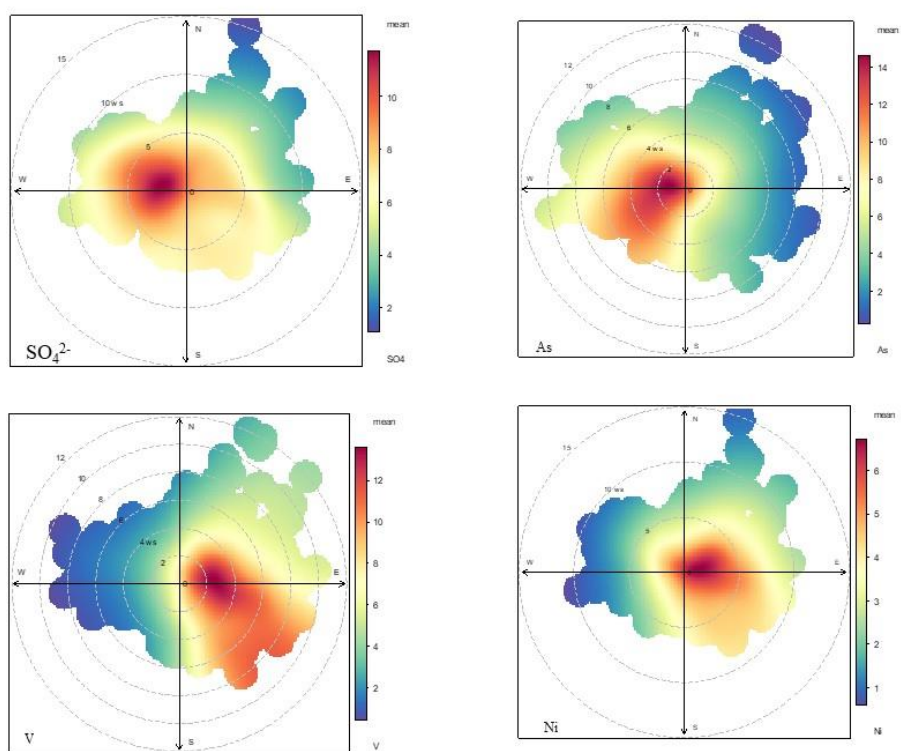

Fig. S4. wind roses of  $\text{SO}_4^{2-}$ , As, Ni, and V

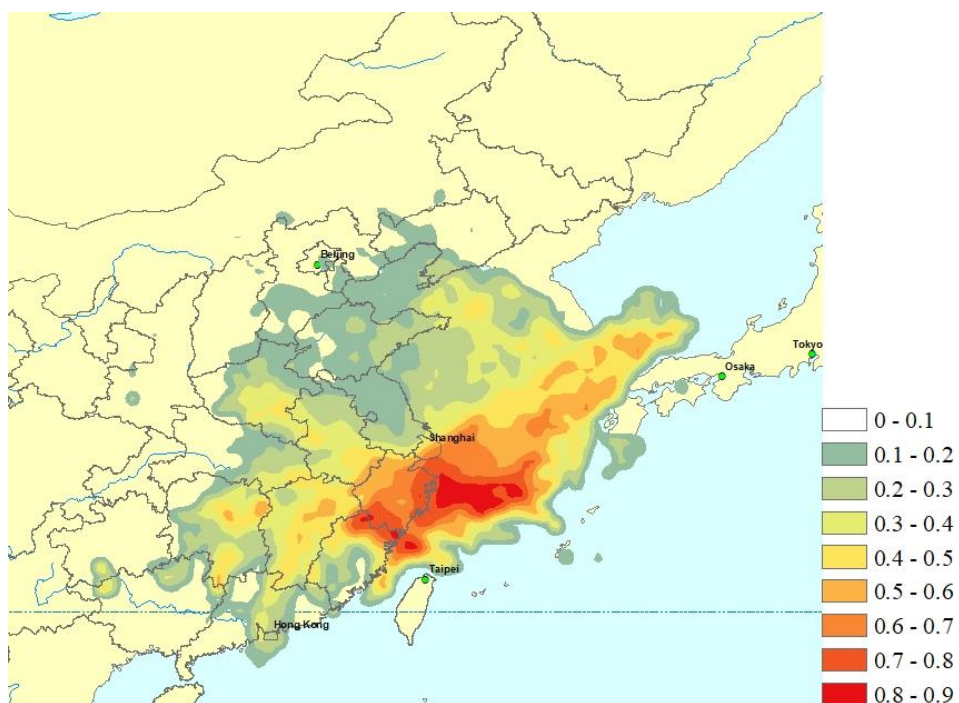

Fig. S5. PSCF modeling of the GEM from factor 2 of PMF modeling.
